# Supplementary material
Source: publisher figshare collection journal article supplement (https://frontiersin.figshare.com/ndownloader/files/31747049)
Supplement: Supplementary file [file 31747049]

## Supplementary Appendix 2

| Study ID                                 | Selection bias                                                                                                                    |                                                                                                                                   | Performance bias                                                                                                                                                           | Detection bias                                                                                                                                                             | Attrition bias                                                 | Reporting bias                                       | Other bias                                 |
|------------------------------------------|-----------------------------------------------------------------------------------------------------------------------------------|-----------------------------------------------------------------------------------------------------------------------------------|----------------------------------------------------------------------------------------------------------------------------------------------------------------------------|----------------------------------------------------------------------------------------------------------------------------------------------------------------------------|----------------------------------------------------------------|------------------------------------------------------|--------------------------------------------|
|                                          | Random sequence generation                                                                                                        | Allocation concealment                                                                                                            |                                                                                                                                                                            |                                                                                                                                                                            |                                                                |                                                      |                                            |
| <b>Tehrani et al., 2017<sup>14</sup></b> | Unclear risk<br>(no randomization details provided)                                                                               | Unclear risk<br>(no randomization details provided)                                                                               | Unclear risk<br>(no blinding details provided)                                                                                                                             | Unclear risk<br>(no blinding details provided)                                                                                                                             | Low risk<br>(85.7% participants were included in the analysis) | Low risk<br>(no potential sources of reporting bias) | Low risk<br>(baseline balanced)            |
| <b>Grant, 2009<sup>24</sup></b>          | Low risk<br>(concealment of allocation was achieved via a computerized program)                                                   | Low risk<br>(concealment of allocation was achieved via a computerized program)                                                   | Low risk<br>(clinical outcome measurements were assessed by two reliable investigators who were blinded to allocation)                                                     | Low risk<br>(clinical outcome measurements were assessed by two reliable investigators who were blinded to allocation)                                                     | Low risk<br>(97.6% participants were included in the analysis) | Low risk<br>(no potential sources of reporting bias) | unclear risk<br>(insufficient information) |
| <b>Chan et al., 2016<sup>25</sup></b>    | Low risk<br>(randomization was performed according to a randomization table with the allocation group sealed in opaque envelopes) | Low risk<br>(randomization was performed according to a randomization table with the allocation group sealed in opaque envelopes) | Low risk<br>(capsules were identical in appearance and both the participants and the investigators were blinded to which treatment group each participant was assigned to) | Low risk<br>(capsules were identical in appearance and both the participants and the investigators were blinded to which treatment group each participant was assigned to) | Low risk<br>(all participants were included in the analysis)   | Low risk<br>(no potential sources of reporting bias) | Low risk<br>(baseline balanced)            |
| <b>Husein et al., 2015<sup>26</sup></b>  | Low risk<br>(participants were randomly assigned by RANDOM ALLOCATION software)                                                   | Low risk<br>(participants were randomly assigned by RANDOM ALLOCATION software)                                                   | Low risk<br>(no blinding details provided)                                                                                                                                 | Low risk<br>(no blinding details provided)                                                                                                                                 | Low risk<br>(89.3% participants were included in the analysis) | Low risk<br>(no potential sources of reporting bias) | Low risk<br>(baseline balanced)            |

|                                            |                                                                                             |                                                                                             |                                                                                                             |                                                                                                             |                                                                |                                                      |                                 |
|--------------------------------------------|---------------------------------------------------------------------------------------------|---------------------------------------------------------------------------------------------|-------------------------------------------------------------------------------------------------------------|-------------------------------------------------------------------------------------------------------------|----------------------------------------------------------------|------------------------------------------------------|---------------------------------|
| <b>Mombaini et al., 2017<sup>27</sup></b>  | Unclear risk<br>(no randomization details provided)                                         | Unclear risk<br>(no randomization details provided)                                         | Low risk<br>(the researchers were blinded to the identities of the subjects and which group they belong to) | Low risk<br>(the researchers were blinded to the identities of the subjects and which group they belong to) | Low risk<br>(90.0% participants were included in the analysis) | Low risk<br>(no potential sources of reporting bias) | Low risk<br>(baseline balanced) |
| <b>Farhadian et al., 2020<sup>28</sup></b> | Low risk<br>(randomization was performed by a person who did not know the research project) | Low risk<br>(randomization was performed by a person who did not know the research project) | Low risk<br>(double-blind and capsules were identical in appearance)                                        | Low risk<br>(double-blind and capsules were identical in appearance)                                        | Low risk<br>(all participants were included in the analysis)   | Low risk<br>(no potential sources of reporting bias) | Low risk<br>(baseline balanced) |
